# Supplementary material for: Quercetin–Resveratrol Combination for Prostate Cancer Management in TRAMP Mice
Source: PubMed Central journal article supplement (PMC7465013; doi:10.3390/cancers12082141), 2020-08-02
Supplement: cancers-12-02141-s001.pdf [file cancers-12-02141-s001.pdf]

# Supplementary Materials: Quercetin-Resveratrol Combination for Prostate Cancer Management in TRAMP mice

Chandra K. Singh, Gagan Chhabra, Mary A. Ndiaye, Imtiaz A. Siddiqui, Jennifer E. Panackal, Charlotte A. Mintie and Nihal Ahmad

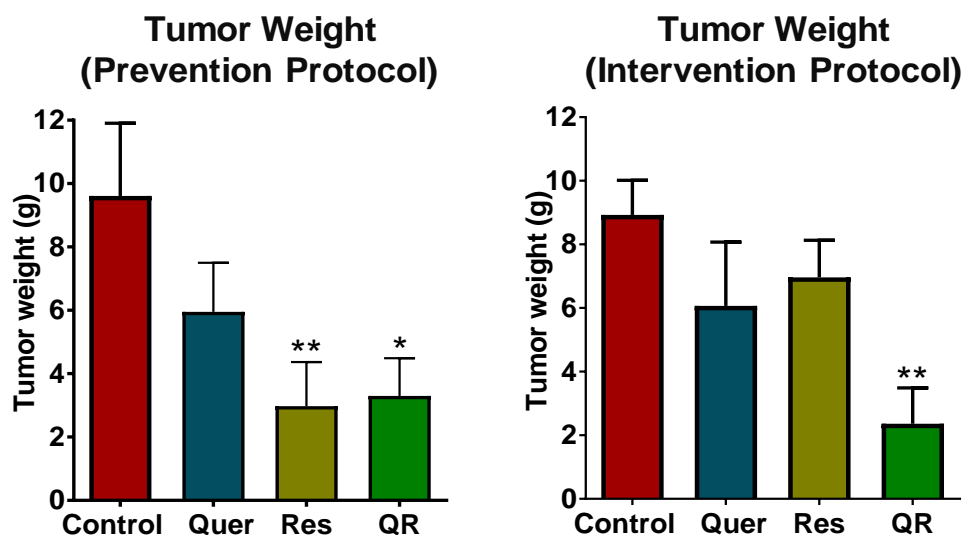

**Figure S1.** Tumor weight after removal of mice with no tumors at end of study. The re-analysis of tumor weight data presented in Figures 1C and 1E after the exclusion of TRAMP mice which failed to develop tumors (3 mice per group). Data is shown as mean  $\pm$  SEM of 9 animals per group. GraphPad Prism 5 Software (GraphPad Software Inc.) was used to perform statistical analyses on tumor data using a one-way analysis of variance (ANOVA) followed by Sidak multiple comparison tests (\* $p < 0.05$ , \*\* $p < 0.01$ ).

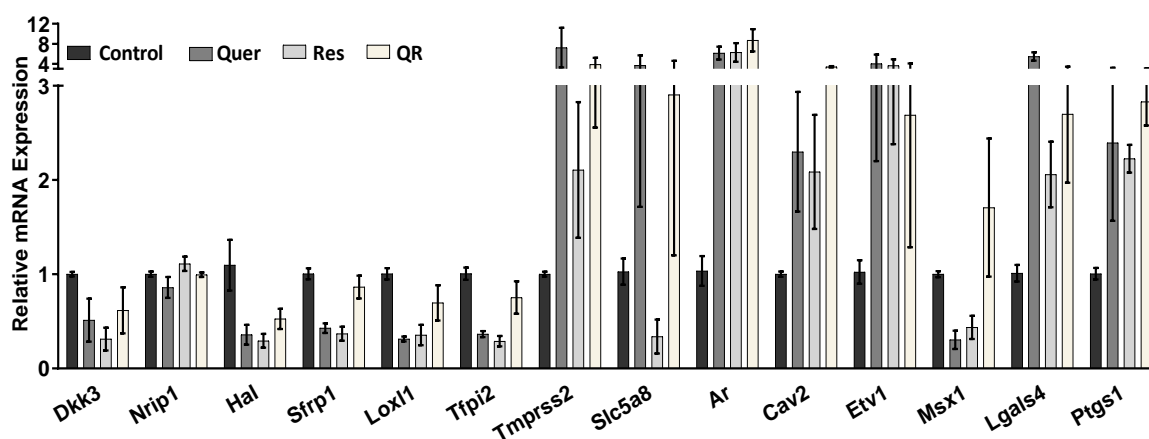

**Figure S2.** PCR array validation that resulted in inconclusive or non-significant outcomes. Data is presented as the mean  $\pm$  SEM of two biological pools of three animals per group ( $n=6$ ) in technical triplicate. A one-way ANOVA with Tukey's multiple comparison test was performed using GraphPad Prism 5 Software (\*\* $p < 0.01$ , \*\*\* $p < 0.001$ , \*\*\*\* $p < 0.0001$ ).

## Immunoblots from Figure 3

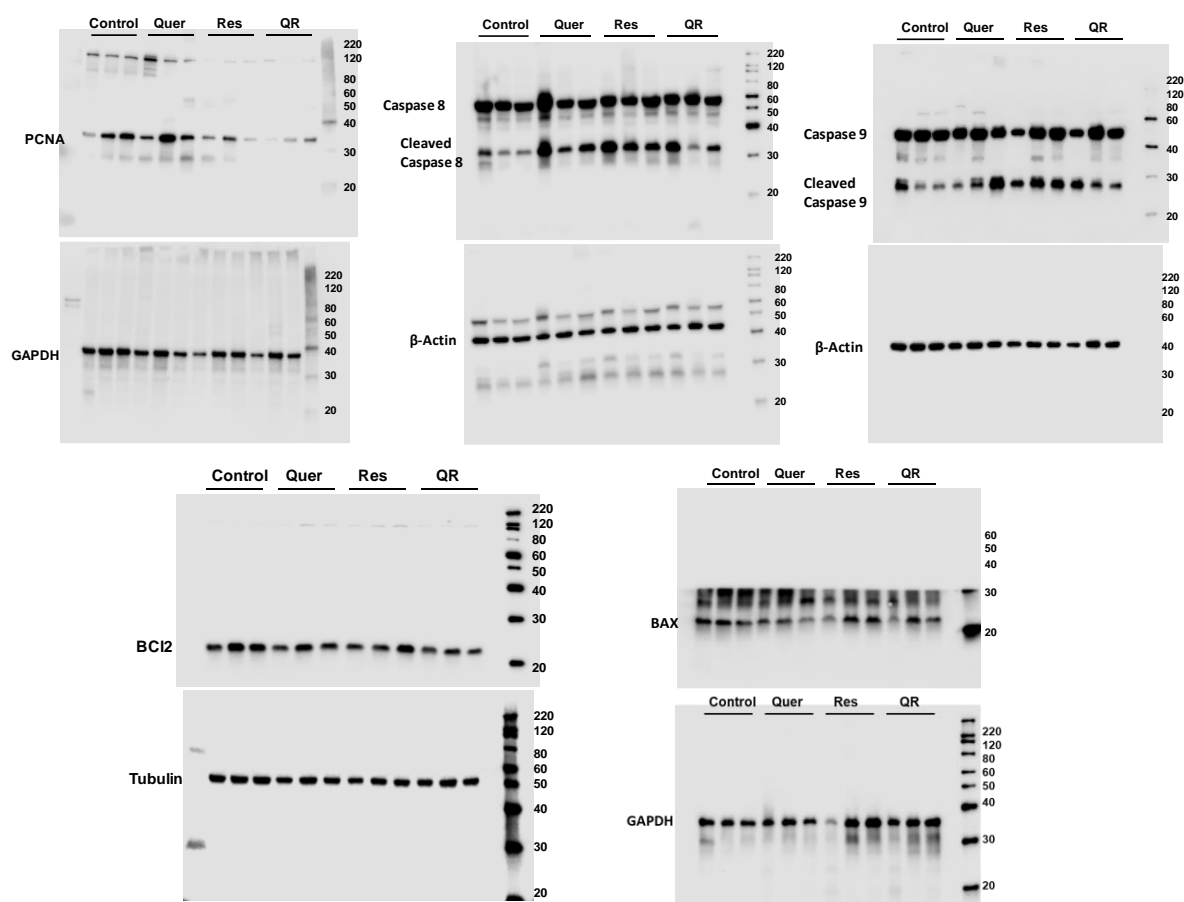

**Figure S3.** Full immunoblots from images used in Figure 3. After incubating with appropriate primary and secondary antibodies, blots were exposed to chemiluminescent developer substrate and images were acquired using a Li-Cor Odyssey Fc imager. Numbers on the right indicate molecular weight markers (kDa), and lanes are labeled on the top. Quer = quercetin; Res = resveratrol, QR = quercetin+resveratrol combination treatments.

## Immunoblots from Figure 5

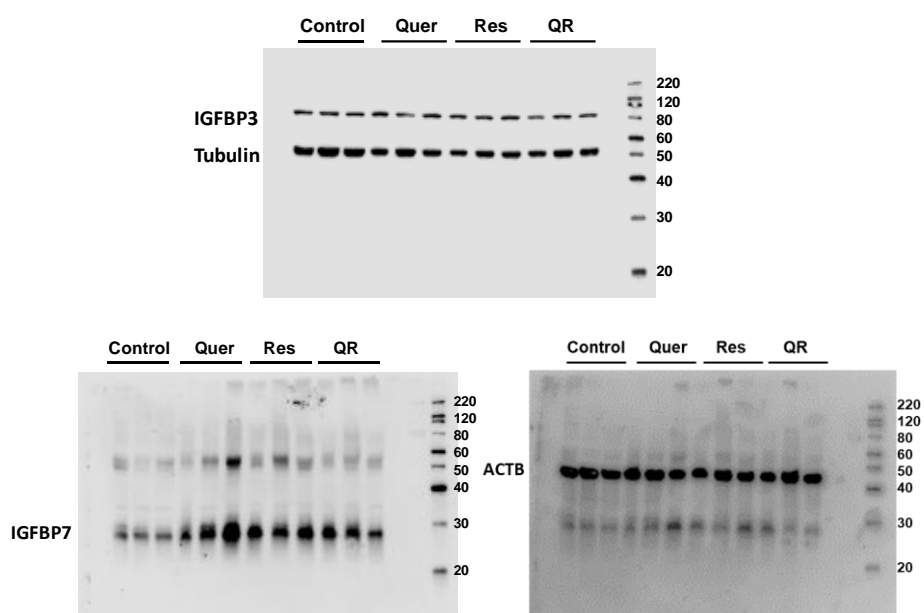

**Figure S4.** Full immunoblots from images used in Figure 5. After incubating with appropriate primary and secondary antibodies, blots were exposed to chemiluminescent developer substrate and images were acquired using a Li-Cor Odyssey Fc imager. Numbers on the right indicate molecular weight markers (kDa), and lanes are labeled on the top. IGFBP3 molecular weight appeared higher than the antibody company suggested, but we tried multiple antibodies and the same band arose, so we are confident that this is the correct band. Quer = quercetin; Res = resveratrol, QR = quercetin+resveratrol combination treatments.

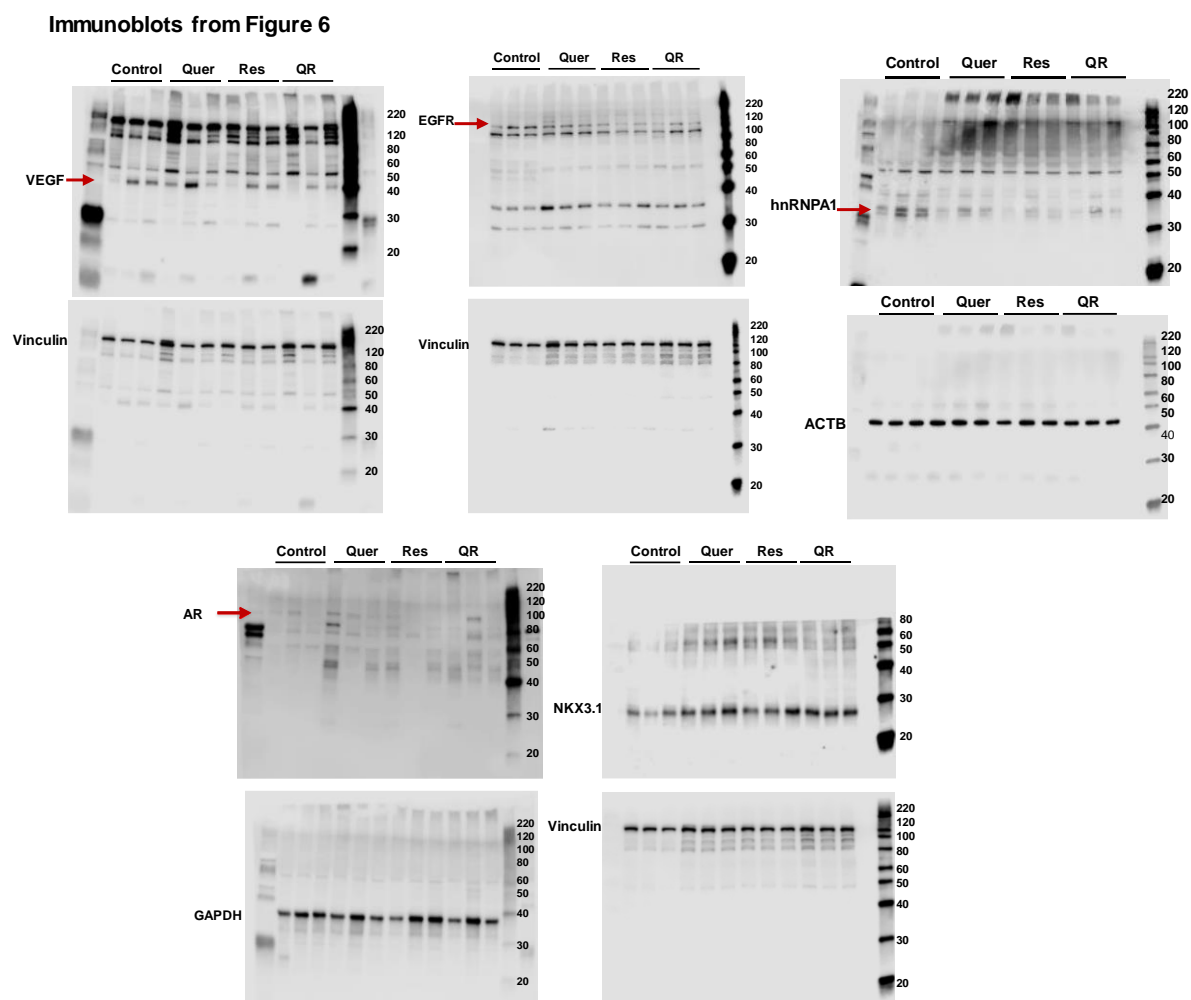

**Figure S5.** Full immunoblots from images used in Figure 6. After incubating with appropriate primary and secondary antibodies, blots were exposed to chemiluminescent developer substrate and images were acquired using a Li-Cor Odyssey Fc imager. Numbers on the right indicate molecular weight markers (kDa), and lanes are labeled on the top. Quer = quercetin; Res = resveratrol, QR = quercetin+resveratrol combination treatments.

**Table S1.** Results of RT<sup>2</sup> Profile Mouse Prostate Cancer RT-qPCR array.

| RefSeq #         | Gene                 | Description                                           | Quercetin   |         | Resveratrol |         | Quer+Res    |         |
|------------------|----------------------|-------------------------------------------------------|-------------|---------|-------------|---------|-------------|---------|
|                  |                      |                                                       | Fold Change | p Value | Fold Change | p Value | Fold Change | p Value |
| <b>NM_011076</b> | <b><i>Abcb1a</i></b> | ATP Binding Cassette Subfamily B Member 1A            | 1.21        | 0.1381  | -1.43       | 0.0001  | 1.15        | 0.2305  |
| NM_011075        | <i>Abcb1b</i>        | ATP Binding Cassette Subfamily B Member 1B            | -1.09       | 0.1941  | 1.58        | 0.0023  | 1.61        | 0.0216  |
| NM_133360        | <i>Acaca</i>         | Acetyl-Coenzyme A carboxylase alpha                   | -1.01       | 0.8037  | 1.57        | 0.0004  | 1.16        | 0.0544  |
| NM_009652        | <i>Akt1</i>          | Thymoma viral proto-oncogene 1                        | -1.03       | 0.6058  | 1.09        | 0.0331  | -1.17       | 0.0221  |
| NM_007462        | <i>Apc</i>           | Adenomatosis polyposis coli                           | 1.05        | 0.2826  | 2           | 2E-05   | 1.54        | 0.0027  |
| NM_013476        | <i>Ar</i>            | Androgen receptor                                     | 2.33        | 0.0073  | 1.19        | 0.2867  | 2.79        | 0.0013  |
| NM_007489        | <i>Arntl</i>         | Aryl hydrocarbon receptor nuclear translocator-like   | 1.08        | 0.1236  | 1.54        | 0.0012  | -1.07       | 0.122   |
| NM_009741        | <i>Bcl2</i>          | B-cell leukemia/lymphoma 2                            | -2.19       | 0.0011  | -1.6        | 0.0206  | -1.19       | 0.412   |
| NM_018883        | <i>Camkk1</i>        | Calmodulin-dependent protein kinase kinase 1 $\alpha$ | 1.07        | 0.2718  | 1.61        | 0.0004  | 1.41        | 0.0234  |
| NM_009810        | <i>Casp3</i>         | Caspase 3                                             | 1.21        | 0.0241  | 1.05        | 0.3509  | 1.05        | 0.4354  |
| NM_016900        | <i>Cav2</i>          | Caveolin 2                                            | 2.49        | 0.0569  | 1.27        | 0.0741  | 2.23        | 0.0009  |
| NM_007628        | <i>Ccna1</i>         | Cyclin A1                                             | 1.5         | 0.0027  | 1.75        | 0.0082  | 1.06        | 0.6412  |
| NM_007631        | <i>Ccnd1</i>         | Cyclin D1                                             | 1.75        | 0.1115  | 1.37        | 0.1402  | -1.1        | 0.3761  |
| NM_009829        | <i>Ccnd2</i>         | Cyclin D2                                             | -1.2        | 0.2476  | -1.01       | 0.9553  | -1.02       | 0.8615  |
| NM_009864        | <i>Cdh1</i>          | Cadherin 1                                            | 2           | 0.1774  | -1.22       | 0.302   | -2.9        | 0.0163  |
| NM_007669        | <i>Cdkn1a</i>        | Cyclin-dependent kinase inhibitor 1A (P21)            | -1.11       | 0.3973  | -1.01       | 0.9997  | -1.28       | 0.1547  |
| NM_009877        | <i>Cdkn2a</i>        | Cyclin-dependent kinase inhibitor 2A                  | 1.01        | 0.7876  | 1.17        | 0.003   | -1          | 0.9669  |
| NM_009907        | <i>Cln3</i>          | Ceroid-lipofuscinosis, neuronal 3                     | -1.12       | 0.2105  | -1.12       | 0.0489  | -1.59       | 0.0011  |
| NM_133828        | <i>Creb1</i>         | CAMP responsive element binding protein 1             | -1.17       | 0.0898  | 1.31        | 0.0115  | 1.06        | 0.465   |
| NM_001001602     | <i>Dab2ip</i>        | Disabled homolog 2 (Drosophila) interacting protein   | -1.25       | 0.0776  | 1.32        | 0.0104  | -1.11       | 0.2779  |
| NM_007829        | <i>Daxx</i>          | Fas death domain-associated protein                   | 1.29        | 0.0058  | 1.31        | 0.006   | 1.05        | 0.3468  |
| NM_001003919     | <i>Ddx11</i>         | DEAD/H-Box Helicase 11                                | 1.15        | 0.0449  | 1.34        | 0.0176  | -1.06       | 0.5094  |
| NM_015814        | <i>Dkk3</i>          | Dickkopf homolog 3 (Xenopus laevis)                   | -5.1        | 0.001   | -7.21       | 0.0008  | -5.9        | 0.0009  |
| NM_015802        | <i>Dlc1</i>          | Deleted in liver cancer 1                             | 1.22        | 0.1364  | 1.28        | 0.0281  | 1.53        | 0.009   |
| NM_007900        | <i>Ect2</i>          | Ect2 oncogene                                         | -1.12       | 0.1549  | -1.09       | 0.4252  | -1.11       | 0.2306  |
| NM_007912        | <i>Egfr</i>          | Epidermal growth factor receptor                      | -1.95       | 0.0678  | -2.67       | 0.0075  | -5.54       | 0.0021  |
| NM_018781        | <i>Egr3</i>          | Early growth response 3                               | -4.82       | 0.0021  | -1.25       | 0.4571  | -1.85       | 0.0522  |
| NM_133659        | <i>Erg</i>           | Avian erythroblastosis virus E-26 (v-ets) oncogene    | -1.48       | 1E-04   | -1.87       | 0.0004  | 1.32        | 0.0548  |
| NM_007960        | <i>Ets1</i>          | Ets variant gene 1                                    | 2.12        | 0.0005  | 1.94        | 0.0004  | 1.25        | 0.0358  |
| NM_007988        | <i>Fasn</i>          | Fatty acid synthase                                   | -1.07       | 0.213   | 1.52        | 8E-05   | 1.07        | 0.218   |
| NM_019739        | <i>Foxo1</i>         | Forkhead box O1                                       | 1.26        | 0.0765  | 1.64        | 7E-05   | -1.11       | 0.084   |
| NM_007836        | <i>Gadd45a</i>       | Growth arrest and DNA-damage-inducible 45 alpha       | -1.16       | 0.0716  | 2.13        | 7E-06   | -1.22       | 0.1687  |
| NM_145523        | <i>Gca</i>           | Grancalcin                                            | -1.11       | 0.3079  | 1.07        | 0.3442  | -1.01       | 0.9237  |
| NM_008145        | <i>Gnrh1</i>         | Gonadotropin releasing hormone 1                      | 1.46        | 0.0011  | 1.23        | 0.0212  | 1.18        | 0.1421  |
| NM_008161        | <i>Gpx3</i>          | Glutathione peroxidase 3                              | 1.36        | 0.0475  | -1.23       | 0.199   | -1.64       | 0.0046  |
| NM_013541        | <i>Gstp1</i>         | Glutathione S-transferase, pi 1                       | 1.2         | 0.0141  | 1.35        | 0.0005  | -1.12       | 0.0597  |
| NM_010401        | <i>Hal</i>           | Histidine ammonia lyase                               | -2.01       | 0.002   | -1.68       | 0.0099  | -1.11       | 0.246   |
| NM_008255        | <i>Hmgcr</i>         | 3-hydroxy-3-methylglutaryl-Coenzyme A reductase       | 1.11        | 0.0212  | 1.21        | 0.0116  | 1.12        | 0.0801  |
| NM_010512        | <i>Igf1</i>          | Insulin-like growth factor 1                          | -2.64       | 0.0017  | -3.56       | 0.0008  | -2.08       | 0.0039  |

|              |                |                                                          |       |        |        |        |       |        |
|--------------|----------------|----------------------------------------------------------|-------|--------|--------|--------|-------|--------|
| NM_010518    | <i>Igfbp5</i>  | Insulin-like growth factor binding protein 5             | -1.23 | 0.4209 | 4.48   | 0.0013 | -2.29 | 0.0048 |
| NM_001314054 | <i>Il6</i>     | Interleukin 6                                            | -6.37 | 0.0014 | -6.57  | 0.0012 | -6.06 | 0.0023 |
| NM_008715    | <i>Ints6</i>   | Integrator complex subunit 6                             | -1.22 | 0.1195 | 1      | 0.9801 | -1.69 | 0.0168 |
| NM_026167    | <i>Klhl13</i>  | Kelch-like 13 (Drosophila)                               | 1.17  | 0.1556 | -1.38  | 0.0037 | 1.7   | 0.0014 |
| NM_008455    | <i>Klkb1</i>   | Kallikrein B, plasma 1                                   | 3.29  | 0.1626 | 1.69   | 0.2935 | 1.2   | 0.5783 |
| NM_010706    | <i>Lgals4</i>  | Lectin, galactose binding, soluble 4                     | 5.55  | 0.001  | 1.71   | 0.0233 | 1.16  | 0.3417 |
| NM_010729    | <i>Loxl1</i>   | Lysyl oxidase-like 1                                     | -6.62 | 0.006  | -3.45  | 0.0289 | -1.74 | 0.3113 |
| NM_011949    | <i>Mapk1</i>   | Mitogen-activated protein kinase 1                       | 1.21  | 0.0129 | 1.65   | 0.0007 | -1.15 | 0.1081 |
| NM_008558    | <i>Max</i>     | MYC associated factor X                                  | 1.27  | 0.0073 | 1.03   | 0.3936 | -1.14 | 0.226  |
| NM_010835    | <i>Msx1</i>    | Homeobox, msh-like 1                                     | -3.52 | 0.0003 | -3.89  | 0.0002 | -1.42 | 0.0167 |
| NM_026658    | <i>Mto1</i>    | Mitochondrial translation optimization 1 homolog         | 1.22  | 0.0112 | 1.32   | 0.0092 | 1.03  | 0.5966 |
| NM_013865    | <i>Ndrp3</i>   | N-myc downstream regulated gene 3                        | 1.21  | 0.0441 | 1.38   | 0.0007 | 1.37  | 0.0171 |
| NM_008689    | <i>Nfkb1</i>   | Nuclear factor kappa B subunit 1                         | -1.03 | 0.8932 | -1.19  | 0.0479 | -1.09 | 0.0765 |
| NM_010921    | <i>Nkx3.1</i>  | NK3 homeobox 1                                           | 5.34  | 0.1512 | 5.01   | 0.044  | 1.95  | 0.1645 |
| NM_173440    | <i>Nrip1</i>   | Nuclear receptor interacting protein 1                   | -4.04 | 0.1678 | -8.78  | 0.0202 | -9.63 | 0.0202 |
| NM_011062    | <i>Pdpr1</i>   | 3-phosphoinositide dependent protein kinase 1            | 1.2   | 0.035  | 1.61   | 6E-05  | 1.19  | 0.0308 |
| NM_022889    | <i>Pes1</i>    | Pescadillo homolog 1, containing BRCT domain             | -1.01 | 0.7537 | 1.1    | 0.0084 | -1.17 | 0.0127 |
| NM_001034085 | <i>Ppp2r1b</i> | Protein phosphatase 2 scaffold subunit Abeta             | -1.11 | 0.4009 | -1.13  | 0.597  | -1.34 | 0.0531 |
| NM_031869    | <i>Prkab1</i>  | Protein kinase, AMP-activated, beta1 subunit             | 1.31  | 0.0489 | 1.32   | 0.0002 | -1.17 | 0.0478 |
| NM_008960    | <i>Pten</i>    | Phosphatase and tensin homolog                           | -1.16 | 0.3381 | 1.26   | 0.1942 | -1.01 | 0.9257 |
| NM_008969    | <i>Ptgs1</i>   | Prostoglandin-endoperoxide synthase 1                    | 2.93  | 0.0128 | 2.44   | 0.0025 | 1.8   | 0.0517 |
| NM_011243    | <i>Rarb</i>    | Retinoic acid receptor, beta                             | -1.47 | 0.0004 | 1.03   | 0.4313 | 1.04  | 0.6097 |
| NM_019713    | <i>Rassf1</i>  | Ras association (RalGDS/AF-6) domain member 1            | 1.24  | 0.0064 | 1.2    | 0.018  | 1.04  | 0.5815 |
| NM_009029    | <i>Rb1</i>     | Retinoblastoma 1                                         | 1.01  | 0.7525 | 1.6    | 0.0001 | -1.02 | 0.7864 |
| NM_133242    | <i>Rbm39</i>   | RNA binding motif protein 39                             | 1.3   | 0.0036 | 1.34   | 0.0028 | 1.11  | 0.017  |
| NM_011254    | <i>Rbp1</i>    | Retinal binding protein 1, cellular                      | 1.28  | 0.0597 | 1.57   | 0.001  | -1.08 | 0.6927 |
| NM_028148    | <i>Scaf11</i>  | SR-related CTD-associated factor 11                      | -1.01 | 0.9016 | 1.57   | 0.0001 | 1.21  | 0.0345 |
| NM_009859    | <i>Sept7</i>   | Septin 7                                                 | -1.02 | 0.507  | 1.2    | 0.0009 | -1.13 | 0.0468 |
| NM_018754    | <i>Sfn</i>     | Stratifin                                                | -1.33 | 0.3665 | -1.27  | 0.1838 | -1.35 | 0.2488 |
| NM_013834    | <i>Sfrp1</i>   | Secreted frizzled-related protein 1                      | -4.68 | 0.001  | -11.3  | 6E-06  | -3.12 | 6E-05  |
| NM_011367    | <i>Shbg</i>    | Sex hormone binding globulin                             | 1.73  | 0.0539 | 1.44   | 0.1444 | 1.3   | 0.2118 |
| NM_145423    | <i>Slc5a8</i>  | Solute carrier family 5 (iodide transporter), member 8   | 3.52  | 0.054  | -10.36 | 0.0019 | 1.13  | 0.6243 |
| NM_007707    | <i>Socs3</i>   | Suppressor of cytokine signaling 3                       | -1.58 | 0.0041 | -1.3   | 0.0183 | -1.43 | 0.039  |
| NM_009238    | <i>Sox4</i>    | SRY-box containing gene 4                                | 1.28  | 0.0597 | 1.57   | 0.001  | -1.08 | 0.6927 |
| NM_011480    | <i>Srebf1</i>  | Sterol regulatory element binding transcription factor 1 | 1.28  | 0.2504 | 1.32   | 0.1081 | -1.61 | 0.0446 |
| NM_011492    | <i>Stk11</i>   | Serine/threonine kinase 11                               | -1.55 | 0.0857 | 1.15   | 0.3334 | -1.33 | 0.5375 |
| NM_028150    | <i>Supt7l</i>  | Suppressor of Ty 7 ( <i>S. cerevisiae</i> )-like         | 1.13  | 0.0516 | 1.54   | 6E-05  | -1.17 | 0.0424 |
| NM_009364    | <i>Tfpi2</i>   | Tissue factor pathway inhibitor 2                        | -1.92 | 0.0003 | -3.28  | 1E-04  | -1.28 | 0.1904 |
| NM_009365    | <i>Tgfb1i1</i> | Transforming growth factor beta 1 induced transcript 1   | 1.07  | 0.2525 | 1.53   | 0.0006 | 1.46  | 0.0025 |
| NM_011594    | <i>Timp2</i>   | Tissue inhibitor of metalloproteinase 2                  | 1.02  | 0.8327 | 1.05   | 0.49   | -1.18 | 0.0193 |
| NM_011595    | <i>Timp3</i>   | Tissue inhibitor of metalloproteinase 3                  | 1.22  | 0.0144 | -2.11  | 0.0003 | -1.19 | 0.0369 |
| NM_015775    | <i>Trmpss2</i> | Transmembrane protease, serine 2                         | 6.56  | 0.0435 | 1.94   | 0.0134 | 1.28  | 0.3619 |
| NM_011640    | <i>Trp53</i>   | Transformation related protein 53                        | -1.26 | 0.0089 | -1.04  | 0.233  | -1.42 | 0.0003 |

---

|           |              |                                                 |      |        |      |        |       |        |
|-----------|--------------|-------------------------------------------------|------|--------|------|--------|-------|--------|
| NM_013700 | <i>Usp5</i>  | Ubiquitin specific peptidase 5 (isopeptidase T) | 1.07 | 0.1824 | 1.31 | 0.0055 | 1.2   | 0.0672 |
| NM_009505 | <i>Vegfa</i> | Vascular endothelial growth factor A            | 1.08 | 0.0586 | 1.18 | 0.1779 | -1.33 | 0.0086 |

---

Table S2. Primers used for RT-qPCR validation.

| Gene           | Amplicon Size (bp) | Primer Orientation | Primer Sequence (5' → 3') | T <sub>m</sub> (°C) | Location  | Primer Bank ID        |
|----------------|--------------------|--------------------|---------------------------|---------------------|-----------|-----------------------|
| <i>Apc</i>     | 225                | F                  | TCTGGGGACAAAAGGTGGAAT     | 61                  | 915–935   | 158966685c2           |
|                |                    | R                  | CTGGCCCGAGCCTCTTTAC       | 62.1                | 1139–1121 |                       |
| <i>Ar</i>      | 137                | F                  | CAGGAGGTAATCTCCGAAGGC     | 61.7                | 577–597   | 118129906c2           |
|                |                    | R                  | ACAGACACTGCTTTACACAATC    | 60.7                | 713–691   |                       |
| <i>Bcl2</i>    | 108                | F                  | GAGAGCGTCAACAGGGAGATG     | 62.2                | 469–489   | 133893253c2           |
|                |                    | R                  | CCAGCCTCCGTTATCCTGGA      | 62.9                | 576–557   |                       |
| <i>Cav2</i>    | 140                | F                  | TCTCATCTCAAGCTAGGCTTCG    | 61.3                | 139–160   | 118131204c2           |
|                |                    | R                  | GCCAGAAATACGGTCAGGAACT    | 62                  | 278–257   |                       |
| <i>Dkk3</i>    | 148                | F                  | CAGCTCTCAACTACCCCTCAGG    | 61.3                | 107–127   | 31560475c1            |
|                |                    | R                  | ACCTCAGAGGACGTTTATAGCA    | 60.8                | 254–234   |                       |
| <i>Egfr</i>    | 136                | F                  | CAATGTTCCCATCGCTGTCGT     | 63                  | 652–672   | 90403617c3            |
|                |                    | R                  | TGCTTTTGTCATGTGGCCTCAT    | 62.3                | 787–767   |                       |
| <i>Egr3</i>    | 80                 | F                  | TTGCCTGACAATCTGTACCCC     | 61.8                | 58–78     | 118130757c1           |
|                |                    | R                  | TAATGGGCTACCGAGTCGCT      | 62.6                | 137–118   |                       |
| <i>Etv1</i>    | 184                | F                  | GGTCTGCTTGCAGTCAAGAG      | 60.7                | 179–198   | 253683440c2           |
|                |                    | R                  | GGTTTCGGAGTATGAGCTGTGT    | 62                  | 362–341   |                       |
| <i>Hal</i>     | 223                | F                  | AATACCGGGAGCCTGAAAAATAC   | 60.4                | 317–339   | 31981709c3            |
|                |                    | R                  | GCAGGGATTACAGTTCTAGCAAA   | 60.3                | 539–517   |                       |
| <i>Igf1</i>    | 142                | F                  | GTGGATGCTCTTCAGTTCGTGTG   | 61                  | 473–495   | Origene Gene ID 16000 |
|                |                    | R                  | TCCAGTCTCCTCAGATCACAGC    | 60.6                | 615–594   |                       |
| <i>Igfbp5</i>  | 154                | F                  | CCAAGCACACTCGCATTTCC      | 61.9                | 413–432   | 70909321c2            |
|                |                    | R                  | CCTTGTTCCGATTCTGTCTCAT    | 61.9                | 566–544   |                       |
| <i>Il6</i>     | 131                | F                  | CTGCAAGAGACTTCCATCCAG     | 60.1                | 14–34     | 13624310c1            |
|                |                    | R                  | AGTGGTATAGACAGGTCTGTTGG   | 60.8                | 144–122   |                       |
| <i>Lgals4</i>  | 76                 | F                  | TGGGTACAACCCTCCACAGAT     | 62.3                | 519–539   | 343478165c2           |
|                |                    | R                  | ATATGGCACACGCGGATTGAA     | 62.5                | 594–574   |                       |
| <i>Lox11</i>   | 175                | F                  | TGCCCCGACAACTGGAGAGA      | 62.5                | 371–389   | 255759948c1           |
|                |                    | R                  | TGCGGATAGGGGAACTGCT       | 62.7                | 545–527   |                       |
| <i>Msx1</i>    | 102                | F                  | GCACAAGACCAACCGCAAG       | 61.9                | 504–522   | 113199782c2           |
|                |                    | R                  | CGCTCGGCAATAGACAGGT       | 61.8                | 605–587   |                       |
| <i>Nkx3.1</i>  | 125                | F                  | GACTGTGAACATAATCCAGGGG    | 60.1                | 316–337   | 146134368c2           |
|                |                    | R                  | TGATGGCTGAACTTCTCTCC      | 61.2                | 440–420   |                       |
| <i>Nrip1</i>   | 176                | F                  | AGACCAGAACTTTAACCTCTCGG   | 61.3                | 141–163   | 27734110a1            |
|                |                    | R                  | CGAGGGCTAAACACAGCCTCT     | 61.3                | 316–296   |                       |
| <i>Ptgs1</i>   | 129                | F                  | ATGAGTCGAAGGAGTCTCTCG     | 60.4                | 1–21      | 144227245c1           |
|                |                    | R                  | GCACGGATAGTAACAACAGGGA    | 61.7                | 129–108   |                       |
| <i>Sfrp1</i>   | 86                 | F                  | TACTGGCCCCGAGATGCTCAA     | 62.9                | 448–467   | 227908833c1           |
|                |                    | R                  | GAGGCTTCCGTGGTATTGGG      | 62.3                | 533–514   |                       |
| <i>Slc5a8</i>  | 108                | F                  | TTATGGGCGGTCCGAGTATG      | 62.1                | 137–156   | 110347554c2           |
|                |                    | R                  | CAAAAACGGTAGACCTCGGCA     | 62.1                | 244–225   |                       |
| <i>Tfpi2</i>   | 203                | F                  | CTCTGCCAACAGACTTGCG       | 61                  | 241–259   | 142382435c2           |
|                |                    | R                  | GGTTCACACAAGCCCTTACAT     | 60.2                | 443–423   |                       |
| <i>Tmprss2</i> | 111                | F                  | ATGCTCCGAGGATTACAACGC     | 62.5                | 155–175   | 34328225c2            |
|                |                    | R                  | CGAGGGCTAAACACAGCGATT     | 62.7                | 265–245   |                       |
| <i>Bax</i>     | 137                | F                  | AGACAGGGGCCTTTTTGCTAC     | 62.3                | 62–82     | 133778943c1           |
|                |                    | R                  | AATTCGCCGGAGACTCG         | 62.1                | 198–180   |                       |
| <i>Nrf2</i>    | 153                | F                  | TAGATGACCATGAGTCGCTTGC    | 62.1                | 389–410   | 76573877c2            |
|                |                    | R                  | GCCAAACTTGCTCCATGTCC      | 61.6                | 541–522   |                       |
| <i>Keap1</i>   | 104                | F                  | TGCCCTGTGGTCAAAGTG        | 62.1                | 58–68     | 7710044a1             |
|                |                    | R                  | GGTTCGGTTACCGTCTGC        | 62.7                | 153–135   |                       |
| <i>Actb</i>    | 154                | F                  | GGCTGTATTCCTCCATCG        | 61.8                | 84–103    | 6671509a1             |
|                |                    | R                  | CCAGTTGGTAACAATGCCATGT    | 61.1                | 237–216   |                       |
| <i>Gapdh</i>   | 95                 | F                  | AGGTCGGTGTGAACGGATTG      | 62.6                | 08–28     | 126012538c1           |
|                |                    | R                  | GGGGTCGTTGATGGCAACA       | 62.6                | 102–84    |                       |



**Table S3.** Antibodies used for immunohistochemistry and immunoblotting.

| Protein Name     | Supplier           | Catalog Number | WB Dilution | Molecular Weight (kDa) | IHC Dilution |
|------------------|--------------------|----------------|-------------|------------------------|--------------|
| Ki67             | Cell Signaling     | 12202          | –           | –                      | 1:500        |
| PCNA             | Invitrogen         | PA5-27214      | –           | –                      | 1:500        |
| Survivin         | Cell Signaling     | 2802           | –           | –                      | 1:500        |
| 4-Hydroxynonenal | Abcam              | ab46545        | –           | –                      | 1:150        |
| PCNA             | Santa Cruz Biotec. | sc-56          | 1:500       | 36                     | –            |
| Caspase 8        | Cell Signaling     | 9746           | 1:1000      | 43, 18                 | –            |
| Caspase 9        | Cell Signaling     | 9505           | 1:1000      | 47, 35                 | –            |
| BCL2             | Santa Cruz Biotec. | sc-7382        | 1:500       | 26                     | –            |
| BAX              | Cell Signaling     | 2772           | 1:1000      | 20                     | –            |
| IGFBP3           | Santa Cruz Biotec. | sc-6003        | 1:500       | 40                     | –            |
| IGFBP7           | Santa Cruz Biotec. | sc-6064        | 1:2000      | 29                     | –            |
| VEGF             | Proteintech        | 19003-1-AP     | 1:500       | 46                     | –            |
| EGFR             | Proteintech        | 18986-1-AP     | 1:1000      | 134                    | –            |
| AR               | Proteintech        | 22089-1-AP     | 1:1000      | 99                     | –            |
| NKX3.1           | Proteintech        | 10365-1-AP     | 1:500       | 26                     | –            |
| hnRNPA1          | Cell Signaling     | 8443           | 1:1000      | 34, 40                 | –            |
| GAPDH            | Proteintech        | 10494-1-AP     | 1:2000      | 36                     | –            |
| Vinculin         | Cell Signaling     | 13901          | 1:1000      | 124                    | –            |
| ACTB             | Cell Signaling     | 3700           | 1:1000      | 45                     | –            |
| TUBB             | Cell Signaling     | 2128           | 1:1000      | 55                     | –            |

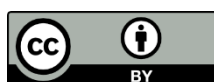

© 2020 by the authors. Licensee MDPI, Basel, Switzerland. This article is an open access article distributed under the terms and conditions of the Creative Commons Attribution (CC BY) license (<http://creativecommons.org/licenses/by/4.0/>).
